# Supplementary material for: Pressure-volume curves of fine roots reveal intraspecific variation across different elevations in a subalpine forest
Source: Springer Nature journal article supplement (doi:10.1007/s10265-025-01618-8), 2025-02-08
Supplement: MOESM1 [file 10265_2025_1618_MOESM1_ESM.pdf]

# Supporting information

**Article title:**

Pressure-volume curves of fine roots reveal intraspecific variation across different elevations in a subalpine forest

**Journal name:**

Journal of Plant Research

**Authors:**

Taiga Masumoto, Yuki Hashimoto, Takumi Ito, Koichi Takahashi, Naoki Makita\*

Faculty of Science, Shinshu University, Matsumoto, Japan

\*Correspondence: Naoki Makita, macky@shinshu-u.ac.jp

The following Supporting Information is available for this article:

**Fig. S1** Root pressure–volume curve examples from *Betula ermanii* and *Abies mariesii*

**Table S1** Air temperature and soil physical properties in 2,000 and 2,500 m during early August to early September. Min, max, and mean values of the daily average at each elevation during the study period are shown for each property

**Table S2** Soil chemical properties in 2,000 and 2,500 m

**Table S3** Fine root pressure–volume curve traits, morphological and chemical traits of *Betula ermanii* and *Abies mariesii* at 2,000 and 2,500 m

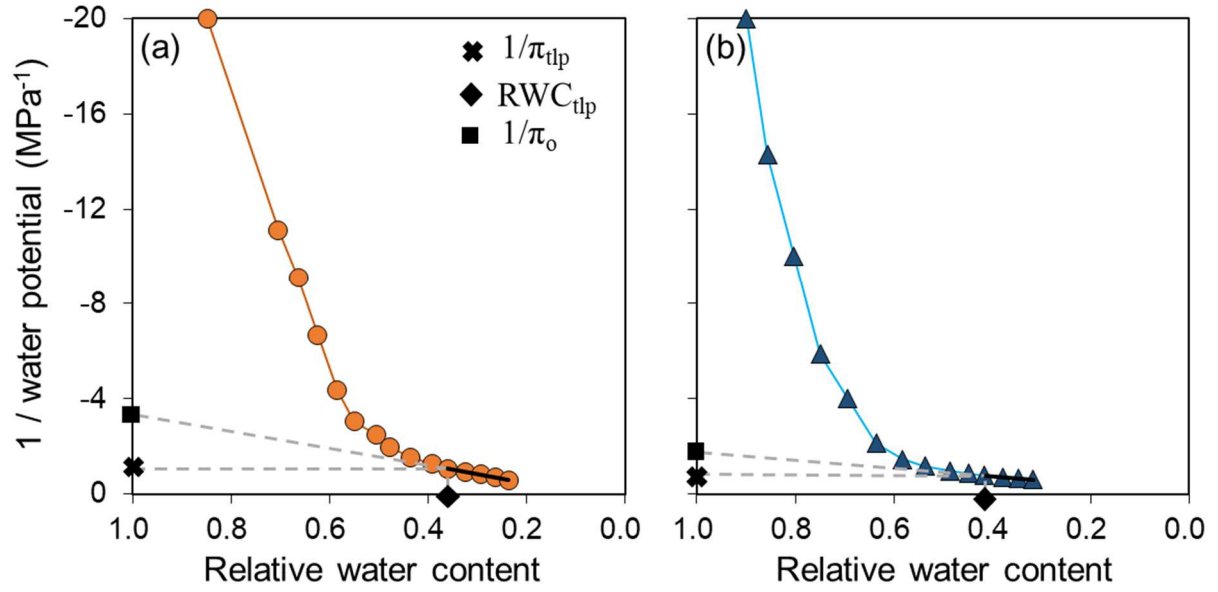

**Fig. S1** Root pressure–volume curve examples from *Betula ermanii* (a) and *Abies mariesii* (b). Inverse of turgor loss point ( $1/\pi_{tlp}$ ; cross), relative water content at  $\pi_{tlp}$  ( $RWC_{tlp}$ ; rhombus), and inverse of osmotic potential at full hydration ( $1/\pi_o$ ; square) are shown. Capacitance ( $C_{fit}$ ; MPa<sup>-1</sup>) is defined as the slope of the relationship between relative water content and water potential above  $\pi_{tlp}$

**Table S1** Air temperature and soil physical properties in 2,000 m and 2,500 m during early August to early September. Min, max, and mean values of the daily average at each elevation during the study period are shown for each property

| Site elevation | Air temperature [°C] |      |      | Soil temperature [°C] |      |      | Soil water potential [kPa] |     |       |
|----------------|----------------------|------|------|-----------------------|------|------|----------------------------|-----|-------|
|                | Min                  | Max  | Mean | Min                   | Max  | Mean | Min                        | Max | Mean  |
| 2,000 m        | 12.1                 | 18.7 | 15.5 | 12.6                  | 16.3 | 15.1 | -6.34                      | 0   | -2.12 |
| 2,500 m        | 9.1                  | 16.6 | 13.3 | 10.7                  | 14.7 | 12.7 | -5.56                      | 0   | -1.29 |

Air temperature and soil physical properties at each elevation were monitored using a data logger from early August to early September 2022. Air temperature was monitored at approximately 1.0 m above the ground using a data logger (LR5001, Hioki, Nagano, Japan). Soil physical properties were monitored on the ground at a depth of 0–15 cm using a data logger (Temperature: RC-5, Elitech Technology Inc., CA, USA; water potential: DIK-3210 i Tensiometer, Daiki Rika Kogyo Co., Ltd., Osaka, Japan).

**Table S2** Soil chemical properties in 2,000 and 2,500 m. Mean values at each elevation are shown, with standard errors in parentheses (n = 6). NH<sub>4</sub>-N, ammonium content; NO<sub>3</sub>-N, nitrate content; DON, dissolved organic nitrogen content; TDN, total dissolved nitrogen content; EC, electrical conductivity; C:N, soil carbon to nitrogen ratio.

| Site elevation | NH <sub>4</sub> -N     | NO <sub>3</sub> -N     | DON                    | TDN                    | pH    | EC                   | C:N   |
|----------------|------------------------|------------------------|------------------------|------------------------|-------|----------------------|-------|
|                | [mg kg <sup>-1</sup> ] | [mg kg <sup>-1</sup> ] | [mg kg <sup>-1</sup> ] | [mg kg <sup>-1</sup> ] |       | [S m <sup>-1</sup> ] |       |
| 2,000 m        | 25.5                   | 0.10                   | 64.0                   | 89.6                   | 4.1   | 0.009                | 20.9  |
|                | (3.0)                  | (0.02)                 | (4.4)                  | (3.4)                  | (0.1) | (0.001)              | (1.4) |
| 2,500m         | 20.1                   | 0.17                   | 39.9                   | 60.2                   | 4.2   | 0.011                | 21.7  |
|                | (3.3)                  | (0.07)                 | (7.1)                  | (10.0)                 | (0.1) | (0.001)              | (2.9) |

The chemical characteristics of the soil were measured as follows: Six soil samples were collected from the top 10 cm of the soil below the litter layer at each elevation in September 2022. The samples were sieved through a 2 mm. Dissolved soil nitrogen was measured in fresh samples. The NH<sub>4</sub>-N and NO<sub>3</sub>-N were measured using the Berthelot and Griess methods, respectively. The TDN content was determined using the Peroxo Oxidizing Reagent method. DON was calculated by subtracting the sum of NH<sub>4</sub>-N and NO<sub>3</sub>-N from TDN. The samples were then air-dried for two weeks. Soil pH, electrical conductivity (EC), and C:N were measured in dry samples. Soil pH and EC were measured using a portable EC and pH meter (D-210PC, HORIBA, Kyoto, Japan). Total soil C and N contents were determined by dry combustion using an CN analyzer (Flash EA 1112, Thermo Fisher Scientific, Cambridge, MA, USA).

**Table S3** Fine root pressure–volume curve traits, morphological and chemical traits of *Betula ermanii* and *Abies mariesii* at 2,000 m and 2,500 m. Mean values for each species at each elevation are shown, with standard errors in parentheses (n = 11).

| Species               | $\pi_{\text{tlp}}$<br>[MPa] | RWC <sub>tlp</sub><br>[%] | C <sub>fit</sub><br>[MPa <sup>-1</sup> ] | $\pi_o$<br>[MPa] | Diameter<br>[mm] | SRL<br>[m g <sup>-1</sup> ] | RTD<br>[g cm <sup>-3</sup> ] | N content<br>[mg g <sup>-1</sup> ] |
|-----------------------|-----------------------------|---------------------------|------------------------------------------|------------------|------------------|-----------------------------|------------------------------|------------------------------------|
| <i>Betula ermanii</i> |                             |                           |                                          |                  |                  |                             |                              |                                    |
| 2,000 m               | −0.95<br>(0.09)             | 38.4<br>(2.4)             | 0.63<br>(0.05)                           | −0.27<br>(0.02)  | 0.49<br>(0.02)   | 27.1<br>(1.8)               | 0.27<br>(0.02)               | 13.7<br>(0.96)                     |
| 2,500m                | −1.11<br>(0.09)             | 35.4<br>(2.6)             | 0.57<br>(0.04)                           | −0.32<br>(0.03)  | 0.45<br>(0.02)   | 33.0<br>(2.6)               | 0.26<br>(0.01)               | 14.8<br>(0.71)                     |
| <i>Abies mariesii</i> |                             |                           |                                          |                  |                  |                             |                              |                                    |
| 2,000 m               | −1.12<br>(0.04)             | 48.4<br>(1.9)             | 0.41<br>(0.01)                           | −0.54<br>(0.02)  | 0.71<br>(0.02)   | 12.5<br>(1.1)               | 0.28<br>(0.01)               | 13.4<br>(0.48)                     |
| 2,500 m               | −1.46<br>(0.10)             | 42.4<br>(2.9)             | 0.35<br>(0.03)                           | −0.56<br>(0.03)  | 0.76<br>(0.02)   | 9.7<br>(1.3)                | 0.34<br>(0.01)               | 9.9<br>(0.40)                      |
